# Electrocardiographic and Hemodynamic Changes and Their Association with Myocardial Infarction during Coronary Artery Bypass Surgery

## A Multicenter Study

Uday Jain, Ph.D., M.D.,\* Claude J. A. Laflamme, M.D.,† Anil Aggarwal, M.D.,‡ James G. Ramsay, M.D.,§ Mark E. Comunale, M.D.,|| Sudhanshu Ghoshal, Ph.D., D.Sc.,# Long Ngo, M.S.,# Krzysztof Ziola, M.D.,# Milton Hollenberg, M.D.,\*\* Dennis T. Mangano, Ph.D., M.D.,†† for the Multicenter Study of Perioperative Ischemia (McSPI) Research Group‡‡

**Background:** Electrocardiographic (ECG) changes during coronary artery bypass graft surgery have not been described in detail in a large multicenter population. The authors describe these ECG changes and evaluate them, along with demo-

graphic and clinical characteristics and intraoperative hemodynamic alterations, as predictors of myocardial infarction (MI) as defined by two sets of criteria.

**Methods:** Data from 566 patients at 20 clinical sites, collected as part of a clinical trial to evaluate the efficacy of acadesine for reducing MI, were analyzed at core laboratories. Perioperative ECG changes were identified using continuous three-lead Holter ECG. Systolic blood pressure, diastolic blood pressure, and heart rate were recorded each minute during operation. The occurrence of MI by Q wave or myocardial fraction of creatine kinase (CK-MB) or autopsy criteria, and by (Q wave and CK-MB) or autopsy criteria was determined.

**Results:** During perioperative Holter monitoring, episodes of ST segment deviation, major cardiac conduction changes  $\geq 30$  min, or use of ventricular pacing  $\geq 30$  min occurred in 58% patients, primarily in the first 8 h after release of aortic occlusion. Of the 25% patients who met the Q wave or CK-MB or autopsy criteria for MI, 19% had increased CK-MB as well as ECG changes. (Q wave and CK-MB) or autopsy criteria for MI were met by 4% of patients. The CK-MB concentration generally peaked by 16 h after release of aortic occlusion. In patients with ( $n = 187$ ) and without a perioperative episode of ST segment deviation, the incidence of MI was 36% and 19%, respectively ( $P < 0.01$ ), by Q wave or CK-MB or autopsy criteria, and 6% and 3%, respectively ( $P = 0.055$ ), by (Q wave and CK-MB) or autopsy criteria. Multiple logistic regression analysis showed that intraoperative ST segment deviation, intraventricular conduction defect, left bundle branch block, duration of hypotension (systolic blood pressure  $< 90$  mmHg) after cardiopulmonary bypass, and duration of cardiopulmonary bypass are independent predictors of Q wave or CK-MB or autopsy MI. The independent predictors of (Q wave and CK-MB) or autopsy MI are intraoperative ST segment deviation and duration of aortic occlusion.

**Conclusions:** Major ECG changes occurred in 58% of patients during coronary artery bypass graft surgery, primarily within 8 h after release of aortic occlusion. Multicenter data collection revealed a substantial variation in the incidence of MI and an overall incidence of up to 25%, with most MI occurring within

\* Assistant Professor of Anesthesia, University of California, San Francisco.

† Clinical Instructor in Anaesthesia, University of Montreal.

‡ Associate Professor of Anesthesiology, Medical College of Wisconsin.

§ Associate Professor of Anesthesiology, Emory University.

|| Instructor in Anesthesia, Harvard Medical School.

# Senior Research Scientist, Ischemia Research and Education Foundation, San Francisco.

\*\* Professor of Medicine, University of California, San Francisco.

†† Director, McSPI Research Group; Professor, Department of Veterans Affairs Medical Center and University of California, San Francisco.

‡‡ See Appendices I and II for names of investigators.

Received from the Departments of Anesthesia at the University of California, San Francisco, California; University of Montreal, Montreal, Quebec; Medical College of Wisconsin, Milwaukee, Wisconsin; Emory University, Atlanta, Georgia; Harvard Medical School, Boston, Massachusetts; the Ischemia Research and Education Foundation (IREF), San Francisco, California; the Department of Medicine, University of California, San Francisco, and the institutions of the McSPI Research Group. Submitted for publication June 12, 1996. Accepted for publication November 21, 1996. Supported in part by the Ischemia Research and Education Foundation and Gensia Pharmaceuticals, Inc. Presented in part at the annual meeting of the American Society of Anesthesiologists, San Francisco, California, October 15-19, 1994.

Address reprint requests to Dr. Jain: University of California, San Francisco, Anesthesiology Service (129), Department of Veterans Affairs Medical Center, 4150 Clement Street, San Francisco, California 94121. Address electronic mail to: uday\_jain@quickmail.ucsf.edu



## ECG AND HEMODYNAMIC CHANGES AND MI DURING CABG

16 h after release of aortic occlusion. Intraoperative monitoring of ECG and hemodynamics has incremental value for predicting MI. (Key words: Anesthesia: cardiac; risk factors. Anesthetic, intravenous: fentanyl. Complications: bradycardia; hypertension; hypotension; myocardial infarction; myocardial ischemia; tachycardia. Enzymes, cardiac-specific: CK-MB. Heart: conduction; ejection fraction; heart rate; infarction; ischemia; pacing. Monitoring: blood pressure; electrocardiography; hemodynamics; Holter electrocardiography. Surgery: cardiac; coronary artery bypass graft.)

MYOCARDIAL ischemia is prevalent in patients undergoing coronary artery bypass graft (CABG) surgery.<sup>1-7</sup> Although electrocardiography (ECG) is commonly used to monitor for myocardial ischemia,<sup>1-7</sup> the changes observed in the ECG have not been described in detail in a large multicenter population. This is especially true of changes other than ST segment depression. Development of a significant Q wave detected by 12-lead ECG and increased myocardial fraction of creatine kinase (CK-MB) are the most commonly used indicators of perioperative myocardial infarction (MI), although there are no widely accepted criteria for MI.<sup>1-7</sup> The timing of occurrence of ischemia and MI has not been described in detail.

Demographic and clinical characteristics<sup>8</sup> and intraoperative ECG changes<sup>1,2,4,6</sup> are reported to be associated with MI and other measures of outcome. Establishment of the incremental value of intraoperative ECG changes and hemodynamic abnormalities for the prediction of MI would help researchers develop strategies to reduce the incidence of MI.

Our objective was to study the various types of perioperative ECG changes and to determine their association with MI, changes in CK-MB, and left ventricular ejection fraction (EF). Multiple logistic regression was used to determine the independent predictive value of preoperative or intraoperative demographic, clinical, Holter ECG and hemodynamic variables for MI as defined by two sets of criteria.

## Materials and Methods

### Study Population

Data were collected from 633 patients undergoing CABG surgery between June 1991 and April 1992 at 20 clinical sites (members of the Multicenter Study of Perioperative Ischemia [McSPI] Research Group; see Appendix 1), as part of a randomized clinical trial (trial 1016) evaluating the effect of acadesine on the inci-

dence of perioperative MI.<sup>5</sup> Results are presented for 566 patients for whom Holter ECG data were available.

Included were patients older than 35 yr who had  $\geq 50\%$  stenosis of the left main coronary artery,  $\geq 70\%$  stenosis of at least two major coronary arteries, or both. Excluded were patients with valvular disease, MI within 7 days before surgery, cardiogenic shock, renal or hepatic insufficiency, patients whose ECG could not be interpreted for ST segment deviation due to preoperative ventricular pacing or left bundle branch block (LBBB), and patients in whom esophageal disease precluded placement of a transesophageal echocardiographic probe. Institutional approval and written informed consent were obtained. For 7 h beginning 15 min before induction of anesthesia, placebo was administered to 187 patients;  $0.05 \text{ mg} \cdot \text{kg}^{-1} \cdot \text{min}^{-1}$  acadesine was given to 192 patients; and  $0.1 \text{ mg} \cdot \text{kg}^{-1} \cdot \text{min}^{-1}$  acadesine was given to 187 patients.

### Perioperative Course

As described previously, patients were premedicated with 1–4 mg lorazepam given orally.<sup>5</sup> Preoperative cardiovascular medications were continued until surgery. Anesthesia was provided using fentanyl, supplemented by midazolam and thiopental.<sup>5</sup> Vecuronium was used to achieve muscle relaxation. Standard monitoring was used. Anti-ischemic medications (such as nitrates and calcium channel blockers) were not administered prophylactically. Postoperative analgesia and sedation were provided with morphine sulfate and midazolam. The trachea was usually extubated on the morning after surgery.

### Holter Electrocardiography

Continuous three-channel Holter (series 8500, Marquette Electronics, Milwaukee, WI) ECG monitoring was performed in all 566 patients for at least 8 h before surgery until 48 h after the start of surgery. Bipolar ECG leads, modified CM<sub>5</sub>, CC<sub>5</sub>, and modified ML were recorded. Modified CM<sub>5</sub> from the left shoulder to V<sub>5</sub> recorded the anterior forces. CC<sub>5</sub> from right-sided V<sub>5</sub> to left-sided V<sub>5</sub> recorded anterior and lateral forces. Modified ML from the left shoulder to the center of the left anterior and posterior iliac spines recorded the inferior forces. After placement of the Holter monitor before operation, the ECG was recorded in the supine, left lateral decubitus, right lateral decubitus, and sitting positions to quantify the effect of body position changes on ST segment deviation.



At the core laboratory, the Holter ECG processing by one investigator (level 1) using a Marquette SXP Laser Holter scanner was verified by two additional investigators (levels 2 and 3). The duration of monitoring was divided into the following periods: preoperative period, from the onset of monitoring to the start of induction of anesthesia; pre-CPB period, from the start of induction of anesthesia to the onset of CPB; CPB period, from the onset to the end of CPB; post-CPB period, from the end of CPB to chest closure; and postoperative period, from chest closure to discontinuation of monitoring. The CPB period included durations when QRS complexes were present before and after asystole due to cardioplegic arrest. To evaluate the univariate and multivariable association with MI, a patient was considered to have intraoperative ST segment deviation if at least one episode of ST segment deviation started or ended during the period between induction of anesthesia and chest closure.

**Holter Electrocardiographic Changes.** Of the many changes observed in Holter ECG, the following were studied. The ECG was considered uninterpretable for detecting ST segment deviation indicative of ischemia during ventricular pacing, LBBB and intraventricular conduction defect, and the presence of a superior QRS axis (*i.e.*, an rS pattern in all the monitored leads). Excessive noise also could render the ECG uninterpretable. The QRS complex was considered to be small if the total QRS amplitude in the lead with the largest QRS complex was less than 5 mm. The duration of these changes and of right bundle branch block (RBBB) was determined.

ST segment deviation usually was measured 60 ms after the J point. In the presence of left ventricular hypertrophy with strain pattern or atrial fibrillation, ST segment deviation was measured at the J point. ST segment deviation considered to be due to change in body position, hypothermia, defibrillation, transient cardiac conduction change, or pericarditis was excluded.<sup>1,2</sup> Episodes of ST segment deviation were identified by reviewing the ECG complexes as previously described.<sup>1,5,9</sup>

The duration of each episode was defined by the time from which the ST segment deviated from the local baseline value to the time when the ST segment reverted to a steady-state value in the ECG lead with the largest peak ST segment deviation. Local baseline was defined as the steady-state period usually less than 15 min before the episode. Episodes lasting at least 1 min and of at least 1-mm peak ST segment deviation from the

local baseline were retained. Episodes were considered discrete if they occurred at least 1 min apart. Characteristics recorded for each episode of ST segment deviation were the time of onset, duration, peak ST segment deviation from the local baseline, heart rate (HR) during the local baseline, and HR at the onset of ST segment deviation. Each episode was assigned to the lead with the greatest peak ST segment deviation, even when the deviation exceeded 1 mm in two or three leads.

For each ischemic episode, the ST segment deviation amplitude-duration integral (area under the curve [AUC]) was calculated. To determine the incidence of ischemic ST segment deviation, an episode of ST segment deviation starting in one perioperative period and ending in another was assigned to the period in which it began. The duration and AUC of ST segment deviation in each period was assigned to that period.

#### *Hemodynamics*

We determined preoperative baseline values for systolic blood pressure (SBP), diastolic blood pressure (DBP), and HR by averaging three values obtained non-invasively when the patient was at rest in the hospital. During operation, HR and invasive SBP and DBP were recorded every minute using ARKIVE (Diatek, San Diego, CA) and the monitoring equipment at the clinical site. As per protocol,<sup>5</sup> during the pre-CPB period, SBP and HR were to be maintained within 20% of preoperative baseline values by adjusting the depth of anesthesia and administering fluids and cardiovascular medications. During CPB, SBP was to be maintained between 40 and 80 mmHg; during the post-CPB period, SBP was to be maintained between 90 and 130 mmHg, with HR at < 110 beats/min.<sup>5</sup>

The association between the occurrence of MI and the number of per-minute samples of SBP, DBP, and HR that crossed a wide range of thresholds in the pre-CPB or post-CPB periods was determined. Results are presented for the protocol-specified thresholds.<sup>5</sup> We also noted the range of thresholds for which an association was present.

#### *Detection of Myocardial Infarction*

Myocardial infarction was defined as fulfilling the Q wave or CK-MB or autopsy criteria listed below. A more conservative definition of MI as fulfilling (Q wave and CK-MB) or autopsy criteria also was used.

**12-Lead Electrocardiography.** We obtained a standard 12-lead ECG before surgery, immediately after sur-



## ECG AND HEMODYNAMIC CHANGES AND MI DURING CABG

gery, on the mornings of postoperative days (POD) 1, 2, 3, and 5, and at hospital discharge. At the core laboratory (Appendix 2), each ECG was first analyzed using the Minnesota Code criteria.<sup>10</sup> The occurrence of Q wave code 1.1 to 1.3 (except 1.2.8) was determined in one or more of the three lead groups: anterolateral (I, AVL, V<sub>6</sub>), posterior-inferior (II, III, AVF), and anterior (V<sub>1</sub>-V<sub>5</sub>). After coding, two physician-electrocardiographers independently evaluated the complete set of ECG for each patient to determine if Q wave criteria for the development of a perioperative MI were met in one or more of the three lead groups. If the two electrocardiographers disagreed, the evaluation of a third electrocardiographer was accepted.

**CK-MB.** We obtained serum samples for analysis of CK-MB, before operation and at 1, 4, 8, 12, 16, 20, 24, 28, 32, 36, 42, 48, and 60 h after the release of aortic occlusion. At the core laboratory (Appendix 2), CK-MB concentration was measured by an immunoenzymetric assay (Tandem-E CK-MB II, Hybritech Diagnostics, La Jolla, CA). To detect MI, the CK-MB thresholds were defined as  $\geq 100$  ng/ml in any postoperative sample, or  $\geq 70$  ng/ml more than 12 h after release of aortic occlusion, or  $\geq 12$  ng/ml more than 24 h after release of aortic occlusion.<sup>5</sup>

**Autopsy Myocardial Infarction.** Standard criteria for MI were used during autopsy performed at the clinical site.

#### *Ventriculography*

Preoperative EF was determined at the clinical site from cardiac catheterization performed within 6 months before surgery.<sup>5</sup> Postoperative EF was determined at the clinical site from radionuclide ventriculography performed within 14 days after surgery.

#### *Transesophageal Echocardiography*

The results of transesophageal echocardiographic analysis have been presented in part elsewhere<sup>5</sup> and are not described here.

#### *Statistical Analysis*

The statistical software used was SAS version 6.09 on the Unix platform (SAS Institute, Cary, NC). The Cochran-Mantel-Haenszel test was used to determine the effect of acadesine on the association of MI with ST segment deviation. For dichotomous variables, we used the chi-squared test or Fisher's exact test. For variables with skewed distributions, the Wilcoxon rank sum

test was used. Two-tailed  $P < 0.05$  was considered significant.

To determine the incremental value of Holter ECG and hemodynamic variables to predict MI, univariate and multivariable models of association with MI were constructed for these variables, the use of acadesine, and the clinical and demographic variables previously reported<sup>1,2,4,6,8</sup> to be predictors of MI. Univariate predictors of MI with nominal two-tailed  $P \leq 0.2$  were identified using the chi-squared test or Fisher's exact test for dichotomous predictors, and logistic regression for categorical and continuous predictors. The logistic models were based on predictors having a probability value of 0.10 or less. Odds ratio and 95% confidence interval based on standard error of the logistic coefficient and two-tailed probability value are presented.

The multivariable models were selected to optimize discrimination (the ability to separate MI from non-MI) and calibration (the difference between observed and estimated incidence of MI). A larger area under the receiver-operating characteristic curve signifies better discrimination.<sup>11,12</sup> Greater value of the Hosmer-Lemeshow goodness-of-fit statistic and a probability value greater than 0.05 are associated with better calibration.<sup>12,13</sup>

## Results

### *Demographic and Clinical Characteristics*

Table 1 shows the demographic and clinical characteristics of the 566 patients.

### *Effect of Acadesine*

Acadesine did not have a significant effect on the occurrence of ST segment deviation and its association with MI. No episodes of ST segment deviation, at least one episode of ST segment depression, and at least one episode of ST segment elevation occurred in 68%, 25%, and 11%, respectively, of patients in the placebo group; 64%, 29%, and 13% of patients in the low-dose acadesine group; and 70%, 19%, and 15% of patients in the high-dose acadesine group. The percentages of patients who met Q wave or CK-MB or autopsy criteria, Q wave criteria, and CK-MB criteria for MI were 25%, 8%, and 22%, respectively, in the placebo group; 28%, 9%, and 23% in the low-dose acadesine group; and 21%, 6%, and 18% in the high-dose acadesine group. Because the differences among the three groups were not significant for



**Table 1. The Number and Percentage of Patients with Various Preoperative and Intraoperative Characteristics or the Values of Those Characteristics (n = 566)**

| Characteristics                                          | No. (%) or Value |
|----------------------------------------------------------|------------------|
| <b>Preoperative characteristics</b>                      |                  |
| Mean age (yr)                                            | 63 ± 9           |
| Age > 65 yr                                              | 239 (42)         |
| Female gender                                            | 108 (19)         |
| History of unstable angina                               | 222 (40)         |
| History of hypertension                                  | 338 (60)         |
| Previous myocardial infarction                           | 284 (50)         |
| History of congestive heart failure                      | 63 (11)          |
| Previous coronary artery bypass graft surgery            | 55 (10)          |
| Previous coronary angioplasty                            | 78 (14)          |
| Preoperative hematocrit (%)                              | 34 ± 3           |
| <b>Cardiac catheterization</b>                           |                  |
| Left main coronary stenosis ≥ 50%                        | 125 (22)         |
| Preoperative ejection fraction (n = 408)                 |                  |
| ≤ 40%                                                    | 76 (13)          |
| ≤ 30%                                                    | 23 (6)           |
| Left ventricular end-diastolic pressure (mmHg) (n = 439) | 17 ± 7           |
| <b>Intraoperative characteristics</b>                    |                  |
| Aortic occlusion duration (min)                          | 57.4 ± 21.8      |
| Cardiopulmonary bypass duration (min)                    | 104.4 ± 35.6     |
| Mean number of grafts                                    | 3.3 ± 0.9        |
| Patients receiving internal mammary artery graft         | 497 (81)         |
| Non-blood cardioplegia                                   | 182 (32)         |
| Blood cardioplegia                                       | 384 (68)         |
| Surgeon's assessment of revascularization                |                  |
| Poor                                                     | 5 (1)            |
| Fair                                                     | 35 (6)           |
| Good or excellent                                        | 526 (93)         |

Values are mean ± SD.

these parameters, we combined the groups for the following analyses.

#### *Holter Electrocardiographic Changes*

For the 566 patients studied, we recorded 31,715 h of continuous Holter ECG data.

#### **Incidence of Holter Electrocardiographic Changes.**

Every patient had a change in Holter ECG during perioperative monitoring. The numbers of patients with changes considered to be major are presented in table 2. At least one episode of ST segment deviation, cardiac conduction change (≥30 min), or ventricular pacing (≥30 min) (table 2) occurred in 58% of 566 patients.

There were 322 episodes of ST segment depression; that is, a mean of 2.4 episodes in 24% of patients. There were 104 episodes of ST segment elevation; that is, a mean of 1.4 episodes in 13% of patients. At least one episode of ST segment deviation occurred in 33% of patients and at least one episode each of ST segment elevation and depression in 4% of patients. In leads CM<sub>5</sub>, CC<sub>5</sub>, and ML, maximum ST segment depression occurred in 57%, 39%, and 4% of episodes, respectively, and maximum ST segment elevation occurred in 44%, 9%, and 47% of episodes.

**Temporal Pattern of Holter Electrocardiographic Changes.** Figure 1 shows the time courses of ST segment deviation, new small QRS complex, RBBB, ventricular pacing, superior QRS axis, intraventricular conduction defect, and LBBB. Table 3 shows the number of patients with ST segment deviation in the various perioperative periods.

In the pre-CPB period, of the five episodes of ST segment elevation, three occurred in three patients undergoing repeated operation for CABG, one of whom met CK-MB criteria for MI, and another met CK-MB and inferior Q wave criteria for MI. During CPB, before asystole, there were eight episodes of ST segment elevation and no episodes of ST segment depression. During CPB, after release of aortic occlusion, there were 37 episodes of ST segment elevation and ten episodes of ST segment depression. After release of aortic occlusion, the pattern of cardiac conduction change varied over time and often was different than the standard patterns of persistent conduction change, such as LBBB.

**Characteristics of ST Segment Deviation.** Figure 2 shows the characteristics of ST segment deviation in each perioperative period. ST segment deviation was greater for episodes of elevation than for depression ( $2.5 \pm 1.6$  mm vs.  $1.5 \pm 0.6$  mm;  $P < 0.05$ ). In patients who met Q wave criteria for MI, HR at the onset of episodes of ST segment deviation was less than baseline HR by  $11.5 \pm 33.3$  beats/min in the CPB period and by  $11.5 \pm 9.9$  beats/min in the post-CPB period.

#### *Hemodynamics*

We recorded 1,560 h of continuous SBP, DBP, and HR data from 318 patients. The time-averaged values of SBP, DBP, and HR were  $123 \pm 13$  mmHg,  $62 \pm 8$  mmHg, and  $59 \pm 10$  beats/min, respectively, in the pre-CPB period, and  $107 \pm 11$  mmHg,  $58 \pm 7$  mmHg, and  $86 \pm 11$  beats/min, in the post-CPB period. In the post-CPB period, there were ten or fewer per-minute samples of



## ECG AND HEMODYNAMIC CHANGES AND MI DURING CABG

Table 2. CK-MB, Q Wave, and Change in EF in Patients with Various ECG Changes during Perioperative Monitoring (n = 566).

| Category                               | No. of Patients | Peak CK-MB (ng/ml) | % Patients with Peak CK-MB by 16 h | MI by     |            | Postop EF% - Preop EF% (n = 333) |
|----------------------------------------|-----------------|--------------------|------------------------------------|-----------|------------|----------------------------------|
|                                        |                 |                    |                                    | CK-MB (%) | Q wave (%) |                                  |
| No abnormality                         | 114             | 41 ± 18            | 93                                 | 0         | 0          | 1.9 ± 10.5                       |
| Only small QRS                         | 105             | 45 ± 29            | 92                                 | 0         | 0          | 1.7 ± 10.7                       |
| Cardiac conduction changes             |                 |                    |                                    |           |            |                                  |
| Only RBBB                              | 92              | 43 ± 31            | 95                                 | 0         | 0          | 2.0 ± 13.1                       |
| Superior QRS axis                      | 82              | 75 ± 65*           | 92                                 | 27        | 10         | 1.6 ± 13.7                       |
| IVCD                                   | 58              | 92 ± 92*           | 86                                 | 25        | 9          | -3.2 ± 16.2                      |
| LBBB                                   | 24              | 87 ± 67*           | 79                                 | 35        | 8          | -4.9 ± 16.5*                     |
| Only pacing                            | 17              | 39 ± 14            | 71                                 | 0         | 0          | 0.2 ± 13.8                       |
| ST segment deviation                   |                 |                    |                                    |           |            |                                  |
| ST ↓ CM <sub>5</sub> , CC <sub>5</sub> | 129             | 81 ± 91*           | 81                                 | 31        | 9          | -0.6 ± 13.8                      |
| ST ↓ ML                                | 8               | 79 ± 90*           | 75                                 | 25        | 0          | 5.6 ± 8.1                        |
| 1-1.9 mm ST ↓                          | 119             | 75 ± 79*           | 80                                 | 28        | 8          | -0.9 ± 13.6                      |
| ≥ 2 mm ST ↓                            | 41              | 101 ± 112*         | 83                                 | 37        | 7          | 4.6 ± 12.5                       |
| ST ↑ CM <sub>5</sub> , CC <sub>5</sub> | 45              | 104 ± 102*         | 80                                 | 35        | 18         | -1.6 ± 12.9                      |
| ST ↑ ML                                | 27              | 118 ± 128*         | 82                                 | 41        | 30         | -4.0 ± 13.3                      |
| 1-1.9 mm ST ↑                          | 25              | 118 ± 97*          | 76                                 | 48        | 28         | -3.3 ± 13.1                      |
| ≥ 2 mm ST ↑                            | 54              | 109 ± 115*         | 82                                 | 37        | 19         | -3.2 ± 12.8                      |
| Myocardial infarction (12-lead ECG)    |                 |                    |                                    |           |            |                                  |
| Anterior Q wave                        | 11              | 119 ± 130*         | 73                                 | 33        | 100        | -6.9 ± 8.5*                      |
| Anterolateral Q wave                   | 9               | 158 ± 141*         | 78                                 | 56        | 100        | -10.2 ± 16.8*                    |
| Inferior Q wave                        | 36              | 131 ± 115*         | 72                                 | 49        | 100        | -2.5 ± 10.8                      |
| CK-MB                                  | 116             | 173 ± 104*         | 66                                 | 100       | 17         | -3.8 ± 15.4                      |

Values are mean ± SD.

MI = myocardial infarction; EF = left ventricular ejection fraction; No abnormality = none of the listed ECG changes except small QRS (< 5 mm); Only small QRS = small QRS complex ≥ 30 min and no other listed ECG changes; Only RBBB = right bundle branch block ≥ 30 min and no other listed ECG changes except small QRS; IVCD = intraventricular conduction defect ≥ 30 min; LBBB = left bundle branch block ≥ 30 min; Only pacing = ventricular pacing ≥ 30 min and no other listed ECG changes except small QRS; CM<sub>5</sub>, CC<sub>5</sub> = Holter leads CM<sub>5</sub> or CC<sub>5</sub>; ML = Holter lead ML; ST↓ = ST segment depression episode; ST↑ = ST segment elevation episode.

\*  $P \leq 0.05$  versus the "no abnormality" group.

SBP < 90 mmHg in 60% of patients and no per-minute samples of HR > 110 beats/min in 86% of patients. None of the hemodynamic changes evaluated was significantly associated with intraoperative ST segment deviation.

### Myocardial Infarction

A total of 3,798 12-lead ECGs and 6,777 CK-MB samples were analyzed. Of the 25% patients who met Q wave or CK-MB or autopsy criteria for MI, 19% (of 566) met CK-MB criteria and had a major ECG change (Q wave, ST segment deviation, cardiac conduction changes, or ventricular pacing; see table 2), or met Q wave criteria and had peak CK-MB values greater than 59 ng/ml (mean + SD of the peak CK-MB value in patients in the No Abnormality category in table 2). The greatest incidence of Q wave or CK-MB or autopsy MI

at a single clinical site was 50% (n = 14); the lowest incidences were 0% (n = 3) and 8% (n = 12). The incidence (31%) at the ten clinical sites (n = 342) with the greatest incidence was greater ( $P < 0.01$ ) than the incidence (15%) at the remaining ten sites (n = 224). (Q wave and CK-MB) or autopsy criteria for MI were met by 4% of the patients.

All patients who met autopsy criteria for MI also met CK-MB criteria. Of the patients who met Q wave criteria for MI, 46% also met CK-MB criteria, whereas only 17% of the patients who met CK-MB criteria also met Q wave criteria. Of the 116 patients who met the CK-MB criteria for MI, 85% met the ≥100 ng/ml criterion, 12% met the ≥70 ng/ml criterion, and 3% met the ≥12 ng/ml criterion.

Q wave was first observed immediately after surgery in 41% of patients, on POD 1 in 39%, on POD 2 in 11%,



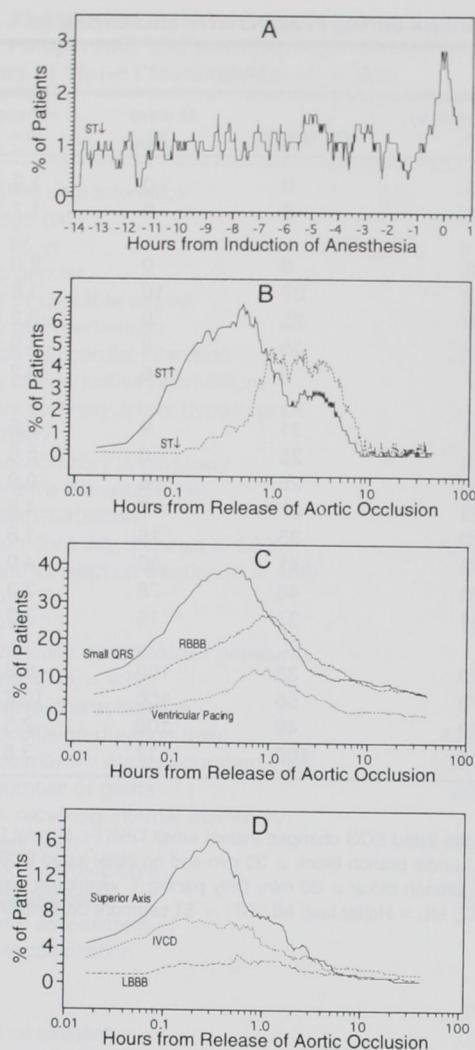

Fig. 1. As a function of time, the percentage of patients whose Holter electrocardiographic data were interpretable for ST segment deviation and who had (A) ST segment depression (ST↓) before aortic occlusion or (B) ST segment depression (ST↓) or ST segment elevation (ST↑) after release of aortic occlusion. As a function of time after release of aortic occlusion, the percentage of all patients with (C) small QRS complex (<5 mm), right bundle branch block (RBBB), ventricular pacing, or (D) superior QRS axis, intraventricular conduction defect (IVCD), and left bundle branch block (LBBB). Only ST segment depression was prevalent in the preoperative and pre-CPB periods and is presented.

on POD 3 in 5%, and on POD 5 and 6 in 2% each of 44 patients meeting Q wave criteria. Eight hours after release of aortic occlusion, 10.8% of all 566 patients had CK-MB  $\geq 100$  ng/ml, gradually decreasing to 9.3% of patients at 24 h.

### Ejection Fraction

Preoperative EF values were obtained in 408 patients. Preoperative and postoperative EF values were obtained in 333 patients. Preoperative EF was not associated with MI or Holter ECG abnormalities listed in table 2. Perioperative changes in EF for patients with various ECG changes are listed in table 2.

### Association of Electrocardiographic Changes with Various Outcomes

In patients with and without ST segment deviation, 36% and 19% of patients, respectively ( $P < 0.01$ ), met the Q wave or CK-MB or autopsy criteria for MI, and 6% and 3% of patients ( $P = 0.055$ ) met the Q wave and CK-MB or autopsy criteria. Of the 140 patients who met Q wave or CK-MB or autopsy criteria, 49% had at least one episode of ST segment deviation. Of the 21 patients who met (Q wave and CK-MB) or autopsy criteria, 52% had at least one episode of ST segment deviation.

Table 2 presents the association of ECG abnormalities with measures of outcome. A patient with multiple abnormalities was included in each relevant category. In the No Abnormality group, the maximum peak CK-MB value was 89 ng/ml, and the greatest mean CK-MB value was observed 1 h after release of aortic occlusion, although CK-MB values had peaked in only 9 of 566 patients.

**Electrocardiographic Lead Groups.** The number of episodes of ST segment depression and elevation with maximum deviation in leads CM<sub>5</sub> or CC<sub>5</sub> for patients fulfilling anterior Q wave criteria for MI were 5 and 4, respectively, and, for anterolateral Q wave criteria, 0 and 2. The corresponding numbers for lead ML for patients fulfilling inferior Q wave criteria for MI were 0 and 8, respectively. For the anterior, anterolateral, and inferior Q wave MI groups, medians of peak CK-MB values were 61 ng/ml, 110 ng/ml, and 88 ng/ml, respectively, and 3, 1, and 12 patients had peak CK-MB values less than 59 ng/ml (mean  $\pm$  SD of the peak CK-MB value in patients in the No Abnormality category in table 2).

**Different Perioperative Periods.** Peak CK-MB values for the 76 patients with preoperative ST segment deviation were  $74 \pm 86$  ng/ml, which did not differ significantly from  $70 \pm 72$  ng/ml for the remaining 490 patients. During CPB or post-CPB periods, ST segment deviation was more likely to be associated with MI (table 3).

**Duration of Electrocardiographic Changes.** A



## ECG AND HEMODYNAMIC CHANGES AND MI DURING CABG

**Table 3. The Number of Patients with ST Segment Deviation during the Various Perioperative Periods and the Percentage of Patients Who Met Various Criteria for Myocardial Infarction**

|                                    |                                  | All Periods | Preoperative | Pre-CPB | CPB | Post-CPB | Postoperative |
|------------------------------------|----------------------------------|-------------|--------------|---------|-----|----------|---------------|
| No ST segment deviation            | No. of patients                  | 379         | 490          | 537     | 516 | 519      | 505           |
|                                    | Q wave or CK-MB or autopsy MI(%) | 19          | 25           | 24      | 23  | 22       | 23            |
|                                    | Q wave (%)                       | 6           | 8            | 7       | 6   | 7        | 8             |
|                                    | MI by CK-MB(%)                   | 16          | 20           | 20      | 20  | 18       | 19            |
| ST segment depression              | No. of patients                  | 137         | 75           | 25      | 10  | 31       | 47            |
|                                    | Q wave or CK-MB or autopsy MI(%) | 34*         | 24           | 40*     | 70* | 39*      | 36*           |
|                                    | Q wave (%)                       | 8           | 7            | 12      | 30* | 10       | 4             |
|                                    | MI by CK-MB(%)                   | 30*         | 23           | 35*     | 60* | 37*      | 34*           |
| ST segment elevation               | No. of patients                  | 72          | 3            | 5       | 43  | 16       | 16            |
|                                    | Q wave or CK-MB or autopsy MI(%) | 47*         | 67*          | 40      | 44* | 75*      | 44*           |
|                                    | Q wave (%)                       | 22*         | 0            | 20      | 26* | 25*      | 19            |
|                                    | MI by CK-MB(%)                   | 37*         | 67*          | 40      | 29* | 69*      | 38            |
| ST segment depression or elevation | No. of patients                  | 187         | 76           | 29      | 50  | 47       | 61            |
|                                    | Q wave or CK-MB or autopsy MI(%) | 36*         | 25           | 41*     | 46* | 51*      | 38*           |
|                                    | Q wave (%)                       | 11*         | 7            | 14      | 26* | 15       | 8             |
|                                    | MI by CK-MB(%)                   | 32*         | 24           | 37*     | 33* | 48*      | 34*           |

CPB = cardiopulmonary bypass; MI = myocardial infarction.

\*  $P \leq 0.05$  versus the group with no ST segment deviation in the same period.

**Fig. 2. The parameters of ST segment deviation on Holter electrocardiographic data for preoperative (Preop), pre-cardiopulmonary bypass (Pre-CPB), CPB, post-CPB, postoperative (Postop), total intraoperative (Intraop), and all combined (All) periods are presented. The percentages or means  $\pm$  SD of each parameter are presented separately for ST segment depression (ST $\downarrow$ ) and ST segment elevation (ST $\uparrow$ ) episodes. Sometimes the means for the two groups are so close that their graphic displays overlap. *A* and *B* present data for episodes starting in the respective periods. *B* to *D* present means  $\pm$  SD per hour of interpretable data for each perioperative period only for patients who had ST segment deviation in that period. AUC = area under the curve, i.e., ST segment deviation-duration integral (mm  $\cdot$  min); HR = heart rate (beats/min). \* $P \leq 0.05$  with respect to the preoperative ST segment deviation of the same type (depression or elevation).**

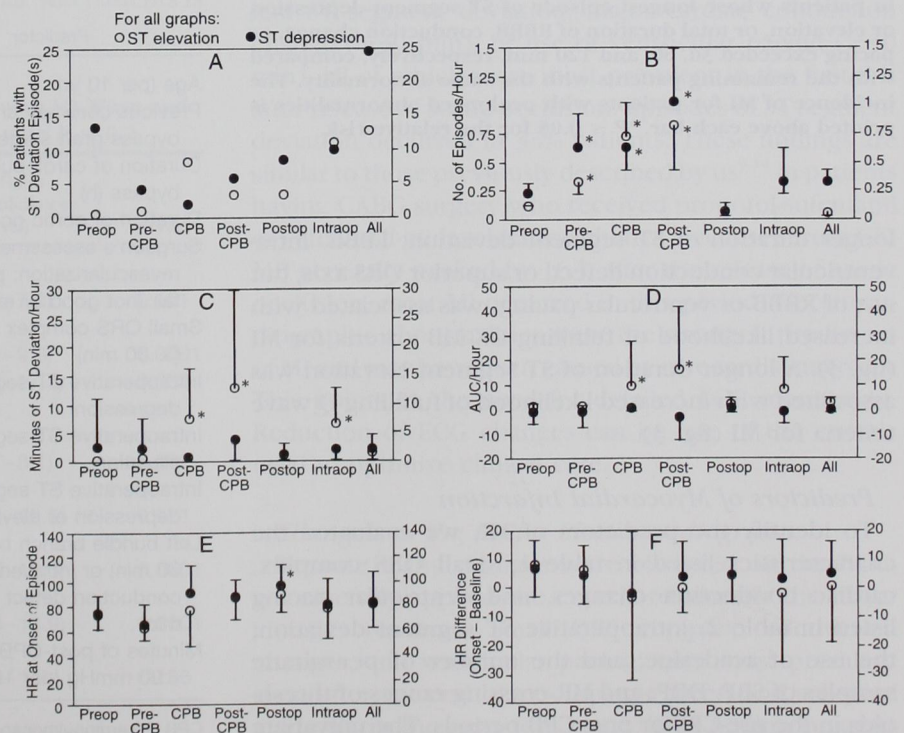



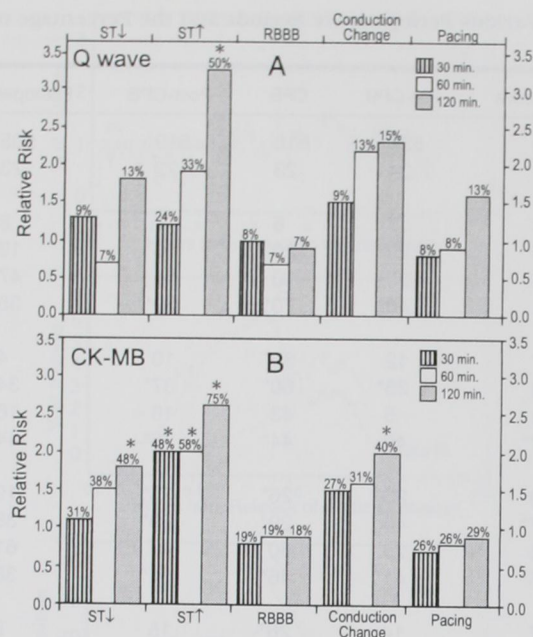

Fig. 3. Data for patients who met (A) Q wave criteria for myocardial infarction (MI) or (B) CK-MB criteria for MI among patients with ST segment depression (ST↓), ST segment elevation (ST↑), right bundle branch block (RBBB), major cardiac conduction change (i.e., left bundle branch block, intraventricular conduction defect, or superior QRS axis)  $\geq 30$  min, or ventricular pacing  $\geq 30$  min. The height of the three bars in each of these ten categories represents the relative risk of MI in patients whose longest episode of ST segment depression or elevation, or total duration of RBBB, conduction change, or pacing exceeded 30, 60, and 120 min, respectively, compared with the remaining patients with the same abnormality. The incidence of MI for patients with prolonged abnormalities is printed above each bar. \* $P \leq 0.05$  for the relative risk.

longer duration of ST segment deviation, LBBB, intra-ventricular conduction defect, or superior QRS axis, but not of RBBB or ventricular pacing, was associated with increased likelihood of fulfilling CK-MB criteria for MI (fig. 3). A longer duration of ST segment elevation was associated with increased likelihood of fulfilling Q wave criteria for MI (fig. 3).

#### Predictors of Myocardial Infarction

To identify the predictors of MI, we evaluated the characteristics listed in table 1; small QRS complex, cardiac conduction changes, and ventricular pacing listed in table 2; intraoperative ST segment deviation; the use of acadesine; and the number of per-minute samples of SBP, DBP, and HR crossing ranges of thresholds in the pre-CPB or post-CPB periods. The univariate

predictors of Q wave or CK-MB or autopsy MI with  $P \leq 0.2$  are presented in table 4. In addition, the number of per-minute samples of post-CPB HR exceeding any threshold in the range 105% to 170% of the preoperative baseline HR, and the number of per-minute samples of post-CPB SBP less than any threshold in the range 100% to 70% of the preoperative baseline SBP, have univariate association with Q wave or CK-MB or autopsy MI at  $P < 0.05$ . The numbers of per-minute samples of post-CPB HR and SBP crossing parts of these ranges are independent multivariable predictors of Q wave or CK-MB or autopsy MI. ST segment elevation is the only significant ( $P < 0.01$ ) univariate predictor of the development of a new significant Q wave.

The selected multivariable models of association with Q wave or CK-MB or autopsy MI are presented in table 5. For the model for all 566 patients, the area under the receiver-operating characteristic curve is 0.66 and the goodness of fit is 3.4 ( $P = 0.91$ ). Because the probability value exceeds 0.05, the model has good calibration.

Table 4. Univariate Models of Association with Q Wave or CK-MB or Autopsy Myocardial Infarction with  $P \leq 0.2$

| Predictor                                                                                                 | Odds Ratio<br>(95%<br>Confidence<br>Interval) | P Value |
|-----------------------------------------------------------------------------------------------------------|-----------------------------------------------|---------|
| Age (per 10 yr)                                                                                           | 1.6 (0.9–1.5)                                 | 0.111   |
| Previous coronary artery<br>bypass graft surgery                                                          | 1.6 (0.9–2.8)                                 | 0.151   |
| Duration of cardiopulmonary<br>bypass (h)                                                                 | 1.6 (1.2–2.2)                                 | 0.002   |
| Duration of aortic occlusion (h)                                                                          | 1.6 (0.9–2.6)                                 | 0.091   |
| Surgeon's assessment of<br>revascularization: poor or<br>fair (not good or excellent)                     | 2.4 (1.3–4.7)                                 | 0.009   |
| Small QRS complex ( $< 5$ mm)<br>( $\geq 30$ min)                                                         | 1.3 (0.9–1.9)                                 | 0.192   |
| Intraoperative ST segment<br>depression                                                                   | 2.8 (1.5–5.2)                                 | 0.001   |
| Intraoperative ST segment<br>elevation                                                                    | 3.7 (2.1–6.5)                                 | 0.0001  |
| Intraoperative ST segment<br>depression or elevation                                                      | 3.5 (2.2–5.7)                                 | 0.0001  |
| Left bundle branch block ( $\geq$<br>30 min) or intraventricular<br>conduction defect ( $\geq 30$<br>min) | 2.1 (1.3–3.5)                                 | 0.004   |
| Minutes of post-CPB SBP<br>$< 90$ mmHg (per 10 min)                                                       | 1.2 (1.1–1.3)                                 | 0.045   |

CPB = cardiopulmonary bypass; SBP = systolic blood pressure.



## ECG AND HEMODYNAMIC CHANGES AND MI DURING CABG

**Table 5. Multivariable Models of Association with Q Wave or CK-MB or Autopsy Myocardial Infarction**

| Predictor                                                                                                                                               | Odds Ratio<br>(95% CI) | Coefficient | Standard<br>Error | P Value |
|---------------------------------------------------------------------------------------------------------------------------------------------------------|------------------------|-------------|-------------------|---------|
| Not including hemodynamics (n = 566)                                                                                                                    |                        |             |                   |         |
| Intraoperative ST segment elevation                                                                                                                     | 4.2 (2.4–7.6)          | 1.44        | 0.30              | 0.0001  |
| Intraoperative ST segment depression                                                                                                                    | 2.8 (1.5–5.4)          | 1.03        | 0.33              | 0.002   |
| Left bundle branch block ( $\geq 30$ min) or intraventricular conduction defect ( $\geq 30$ min)                                                        | 2.3 (1.3–3.9)          | 0.83        | 0.28              | 0.003   |
| Duration of cardiopulmonary bypass (h)                                                                                                                  | 1.6 (1.1–2.2)          | 0.44        | 0.17              | 0.008   |
| Constant                                                                                                                                                |                        | -2.30       | 0.32              |         |
| Including hemodynamics (n = 318)                                                                                                                        |                        |             |                   |         |
| Intraoperative ST segment depression or elevation, or intraventricular conduction defect ( $\geq 30$ min), or left bundle branch block ( $\geq 30$ min) | 2.1 (1.2–3.7)          | 0.75        | 0.29              | 0.01    |
| Minutes of post-CPB SBP $< 90$ mmHg (per 10 min)                                                                                                        | 1.2 (1.0–1.3)          | 0.12        | 0.06              | 0.04    |
| Constant                                                                                                                                                |                        | -1.56       | 0.19              |         |

CI = confidence interval; CPB = cardiopulmonary bypass; SBP = systolic blood pressure.

tion. For the model for 318 patients with hemodynamic data, using the protocol-specified<sup>5</sup> threshold for post-CPB hypotension (SBP  $< 90$  mmHg), the area under the receiver-operating characteristic curve is 0.62 and the goodness of fit is 11.2 ( $P = 0.19$ ).

For (Q wave and CK-MB) or autopsy MI, the univariate predictors with  $P \leq 0.2$  are presented in table 6 and the multivariable model of association for all 566 patients is

**Table 6. Univariate Models of Association with (Q Wave and CK-MB) or Autopsy Myocardial Infarction with  $P \leq 0.2$** 

| Predictor                                                                       | Odds Ratio<br>(95% Confidence<br>Interval) | P Value |
|---------------------------------------------------------------------------------|--------------------------------------------|---------|
| Previous coronary artery bypass graft surgery                                   | 2.3 (0.7–7.0)                              | 0.151   |
| Duration of cardiopulmonary bypass (h)                                          | 4.6 (2.2–9.6)                              | 0.0001  |
| Duration of aortic occlusion (h)                                                | 5.5 (1.8–17.3)                             | 0.003   |
| Surgeon's assessment of revascularization: poor or fair (not good or excellent) | 2.3 (0.7–8.1)                              | 0.200   |
| Intraoperative ST segment depression                                            | 3.9 (1.2–12.6)                             | 0.021   |
| Intraoperative ST segment elevation                                             | 7.1 (2.7–19.0)                             | 0.0001  |
| Intraoperative ST segment depression or elevation                               | 6.8 (2.8–16.9)                             | 0.0001  |
| Minutes of post-CPB HR $> 110$ beats/min (per 10 min)                           | 1.3 (0.9–1.9)                              | 0.186   |

CPB = cardiopulmonary bypass; HR = heart rate.

presented in table 7. For this model, the area under the receiver-operating characteristic curve is 0.78 and the goodness of fit is 4.8 ( $P = 0.78$ ).

## Discussion

During perioperative Holter monitoring, 58% patients had ST segment deviation, major cardiac conduction change ( $\geq 30$  min), or use of ventricular pacing ( $\geq 30$  min), all of which were most prevalent in the first 8 h after release of aortic occlusion. Episodes of ST segment deviation occurred in 33% patients. These findings are similar to those previously described by us<sup>9,14</sup> in patients having CABG surgery who received propofol-sufentanil or sufentanil-midazolam anesthetics. Because serum CK-MB generally peaked by 16 h after the release of aortic occlusion, most MI occurred in this period. Electrocardiographic abnormalities were the strongest predictors of MI and may have been caused by myocardial necrosis. This points to the need for detailed ECG monitoring. Reduction of ECG changes can be one of the criteria used to optimize clinical care.

### *Changes on the Holter Electrocardiogram*

Because many changes were observed on the ECG, we carefully applied the criteria to identify the major changes reported. Small QRS complex, conduction changes, and ventricular pacing were most prevalent soon after the end of cardioplegic arrest and subsided gradually in the next few hours. This finding suggests



Table 7. Multivariable Models of Association with (Q Wave and CK-MB) or Autopsy Myocardial Infarction (n = 566)

| Predictor                            | Odds Ratio (95% Confidence Interval) | Coefficient | Standard Error | P Value |
|--------------------------------------|--------------------------------------|-------------|----------------|---------|
| Intraoperative ST segment elevation  | 8.1 (2.9–23.0)                       | 2.10        | 0.53           | 0.0001  |
| Intraoperative ST segment depression | 4.2 (1.2–14.1)                       | 1.42        | 0.62           | 0.022   |
| Duration of aortic occlusion (h)     | 5.7 (1.8–17.9)                       | 1.73        | 0.59           | 0.003   |
| Constant                             |                                      | –5.35       | 0.76           |         |

that these changes occurred primarily during cardioplegic arrest, reperfusion, or soon after these events. In contrast, although some episodes of ST segment deviation were observed with restoration of cardiac rhythm after cardioplegic arrest, most began minutes to hours later. Thus post-CPB causes contributed to the occurrence of most episodes of ST segment deviation.<sup>15</sup>

Substantially more episodes of ST segment deviation would have been detected in the first 8 h after release of aortic occlusion if they were not masked by ST segment deviation due to cardiac conduction change and ventricular pacing, which were also most prevalent in the same period (fig. 1). The reduced QRS amplitude in this period also decreased the likelihood of ischemia causing a ST segment deviation of at least 1 mm. Detection of changes on the ECG was limited by the leads monitored and by changes in the chest wall. The right ventricle and the anteroseptal wall of the left ventricle were inadequately monitored.<sup>2,16</sup>

Heart rate at the onset of episodes of ST segment depression was greater in the postoperative period than in the preoperative period (fig. 2E). This resetting of the threshold for HR is similar to that reported in ambulatory patients.<sup>17</sup> In the post-CPB and postoperative periods, a few of the episodes of ST segment deviation occurred when HR was fixed by atrial pacing.

### Myocardial Infarction

**Significance of Myocardial Infarction.** The functional and prognostic significance of myocardial necrosis depends on various factors, including size, location, condition of the myocardium, and whether necrosis is diffuse or localized. This hinders the development of widely applicable criteria for MI. Different criteria may be suitable in different settings. During CABG surgery, diffuse myocyte necrosis and necrosis in the distribution of multiple small-caliber coronary arteries may occur.<sup>18,19</sup> Such necrosis may not lead to ST segment deviation or a new Q wave, but it increases serum CK-MB

and may adversely affect function and prognosis. The use of (Q wave and CK-MB) or autopsy criteria for MI may detect only large MI and miss large areas of myocardial necrosis in many patients.

Myocardial infarction detected by the criteria we used have been shown previously to adversely affect function and prognosis. A new significant Q wave<sup>20–22</sup> or increased CK-MB<sup>20</sup> are reported to be associated with reduced survival. Q wave MI detected by Minnesota coding is likely to be confirmed by autopsy.<sup>23</sup> CK-MB > 133 U/l is reported to be associated with autopsy criteria for MI<sup>24</sup> and to correspond approximately to the threshold of CK-MB > 100 ng/ml<sup>25</sup> used in our study. Patients with anterior or anterolateral Q wave MI had reduced postoperative EF in our study (table 2).

Perfusion to the MI occurring during revascularization is increased, unlike perfusion to other MI. Thus the MIs we detected are likely to cause fewer adverse effects than MIs in patients not having revascularization. However, in the setting of percutaneous transluminal coronary angioplasty, even minor elevation of the serum CK-MB level has been shown to be associated with increased incidence of cardiac death and other cardiac complications on follow-up over 3 yr.<sup>26,27</sup>

**Incidence of Myocardial Infarction.** The incidence of MI depends critically on the methods of and criteria for detection.<sup>1–8,18–25,28,29</sup> Although patients with increased CK-MB are reported to have adverse prognosis,<sup>20,24</sup> many studies have not used enzymatic criteria to detect MI.<sup>21,22,28,29</sup> Our incidence of meeting Q wave criteria for MI is within the range reported previously.<sup>21,22,28,29</sup> Despite the use of conservative thresholds for CK-MB, our incidence of meeting CK-MB criteria for MI (21%) is greater than that reported in the past.<sup>4,20</sup> A recent multicenter trial<sup>30</sup> of 2,682 patients (Acadesine Trial #1024) found the incidence of (Q wave and CK-MB) or autopsy MI to be similar to that in our present study. In these 2,682 patients, the CK-MB increase was similar to that in our present study.



## ECG AND HEMODYNAMIC CHANGES AND MI DURING CABG

Our results indicate that when uniform methods of and criteria for detecting MI are used, there is substantial variability in the incidence of MI at different clinical sites. Institutions with a low incidence of MI may be more inclined to publish it in their single-center studies. Previous multicenter studies reporting the incidence of MI generally have allowed each clinical site to have its own method of and criteria for detecting MI.<sup>20</sup>

In our study, a single CK-MB sample drawn between 8 and 24 h after the release of aortic occlusion led to a 10.8–9.3% incidence of CK-MB  $\geq 100$  ng/ml, suggesting that inadequate sampling of CK-MB may lead to identification of only approximately half of the patients who meet our CK-MB criteria for MI. Our results show that to determine the incidence of an outcome such as MI, a protocol for detailed data collection at multiple representative clinical sites and analysis at core laboratories must be used. A high incidence of MI during CABG surgery would explain why, compared with medical therapy, CABG surgery does not provide a long-term survival advantage to patients who are not in high-risk categories of coronary artery disease (CAD).<sup>31</sup> The high incidence of myocardial ischemia and MI observed after CPB points to the need to modify the conduct of CPB and to use safer techniques when possible.

False-positive diagnosis of MI may occur because increased CK-MB may be due to incisions in the atria and skeletal muscles. However, peak CK-MB after uncomplicated cardiac and major noncardiac surgery is reported generally to be substantially less than 100 ng/ml.<sup>2</sup> Significant Q waves after CABG surgery may be caused by unmasking of an old MI<sup>32</sup> or may be unrelated to MI. The 19% patients who met Q wave or CK-MB or autopsy criteria for MI and had both increased CK-MB and major ECG changes are very likely to have had substantial myocardial necrosis.

**Electrocardiographic Lead Groups.** Q wave MI after CABG surgery has been reported<sup>29</sup> to be most common in the inferior leads, as we also observed. The significance of inferior Q wave has been questioned because of a limited association with wall-motion abnormality detected with echocardiography.<sup>29</sup> In our study, 80% of the patients who developed Q wave in the anterior or anterolateral lead groups and 67% of the patients who developed Q wave in the inferior lead group had peak CK-MB levels greater than 59 ng/ml (mean + SD of the peak CK-MB value in patients in the No Abnormality group in table 2). The values of peak CK-MB were comparable in patients with ST segment deviation in the

anterior or anterolateral leads (CM<sub>5</sub>, CC<sub>5</sub>) and inferior (ML) lead. It was uncommon for episodes of ST segment depression to be assigned to lead ML and ST segment elevation to lead CC<sub>5</sub>.

#### Timing of Occurrence of Myocardial Infarction.

Among the 44 patients who met Q wave criteria for MI, a new Q wave was first recorded immediately after surgery in 39% and by the morning of POD 1 in 80% of patients. Peak serum CK-MB concentration occurred within 16 h of release of aortic occlusion in approximately 70% of the patients who had MI (table 2). Clinical care in this period should be optimized to minimize the incidence of MI.

#### Predictors of Myocardial Infarction

Intraoperative ECG changes and duration of post-CPB hypotension were independent predictors of Q wave or CK-MB or autopsy MI, whereas most of the demographic and clinical variables were not selected (table 5). This establishes the incremental value of ECG and hemodynamic monitoring to predict Q wave or CK-MB or autopsy MI. It also suggests that the risk of MI depends primarily on the perioperative course rather than on the patient's preoperative status. This is also suggested by the association of Q wave or CK-MB or autopsy MI with duration of CPB and the surgeon's assessment of revascularization (table 4), which is similar to some previous reports.<sup>4</sup> However, the previous studies<sup>8</sup> of predictors of MI generally have not evaluated the intraoperative predictors in detail. Fewer significant predictors of (Q wave and CK-MB) or autopsy MI were identified, in part, because of the smaller number of patients with such MI.

**Holter Electrocardiographic Changes.** The association with MI of intraoperative ST segment deviation (tables 4–7) and the elevated peak CK-MB in patients with ST segment deviation (table 2) suggest that many episodes of ST segment deviation may be due to myocardial necrosis, similar to that in ambulatory patients with acute MI.<sup>16,33</sup> Compared with ST segment depression, ST segment elevation was associated with more severe necrosis. The magnitude of ST segment deviation in excess of 1 mm did not correlate with the severity of necrosis (table 2), possibly because of the reduced QRS amplitude after CPB. The episodes of ST segment deviation were identified after eliminating ST segment deviation due to nonischemic causes. Episodes of ST segment deviation starting or ending during operation were used in tables 4–7 because in a clinical setting more careful



ECG monitoring is often performed during operatively than before or afterward.

ST segment deviation may be used to estimate the timing of some myocardial injuries and thus their proximate triggers. In contrast to previous studies,<sup>4</sup> in our patients preoperative ST segment deviation (table 3) or preoperative history of unstable angina (tables 4 and 6) were not associated with MI. Two patients having repeated operation may have had MI at the time of ST segment elevation in the pre-CPB period.<sup>2,34</sup> Table 3 and CK-MB release pattern suggest that few other MIs occurred in the pre-CPB period. The strong association with MI (table 3) of episodes of ST segment deviation occurring minutes to hours after the release of aortic occlusion suggests that most of the MIs were triggered in this period in patients rendered susceptible by CPB.<sup>1,2,15</sup> For patients who met Q wave criteria for MI, HR at the onset of episodes of ST segment deviation occurring after release of aortic occlusion was less than the baseline HR. This indicates that a reduction in myocardial oxygen supply was an important mechanism of development of Q wave.<sup>1,2,15</sup> Intraventricular conduction defect and LBBB may also be indicative of the occurrence of myocardial necrosis (tables 2, 4, 5), as in ambulatory patients. Such necrosis may occur during CPB, reperfusion, or soon after those events.

Prolonged ECG changes were associated with a greater incidence of MI (fig. 3), consistent with previous reports.<sup>35,36</sup> This suggests that a therapeutic intervention that corrects the abnormality causing a new ECG change may reduce the incidence of MI. This confirms the utility of ECG monitoring.

**Hemodynamic Abnormalities.** Morbidity including MI is more likely in patients with lower blood pressure during CPB.<sup>37</sup> Post-CPB hypotension and tachycardia are reported to be associated with left ventricular wall-motion abnormality, which is associated with MI.<sup>3,38</sup> In our study, the values of blood pressure were affected by site-specific equipment and patient-specific hydraulics of the monitoring systems. In addition, only baseline blood pressure was not obtained invasively. These factors are unlikely to alter the conclusion that post-CPB hypotension is associated with Q wave or CK-MB or autopsy MI because the association was demonstrated for a wide range of thresholds. Hemodynamic abnormalities occurred despite usual attempts to maintain stability. Only a controlled clinical trial testing more

than one range of hemodynamics can determine if more intensive efforts to maintain hemodynamics within a certain range would reduce the incidence of MI. Hemodynamic abnormalities were not shown to be associated with (Q wave and CK-MB) or autopsy MI, possibly because of the small number of patients with such MI.

Previously, we found a high incidence of intraoperative episodes of hemodynamic abnormalities lasting at least 5 min and a lack of temporal association of these episodes with new ST segment deviation.<sup>9</sup> Hence, overall burden of hypotension and tachycardia after CPB, rather than isolated episodes, may be the determinant of fulfilling CK-MB criteria of MI. Because hypotension and tachycardia occurring only in the post-CPB period were shown to be associated with Q wave or CK-MB or autopsy MI, maintenance of adequate hemodynamics is important, especially when increased susceptibility to MI exists.

#### *Comparison with Other Populations*

ST segment elevation, although common in patients with acute MI<sup>33</sup> and occurring in 13% of our patients, is rare in patients with CAD or risk factors for CAD who are undergoing major noncardiac surgery<sup>39,40</sup> and in ambulatory patients with stable<sup>41</sup> or unstable angina.<sup>35</sup> New cardiac conduction change, ventricular pacing, and small QRS complex are common in our population, but not in the other previously mentioned populations. In patients with CAD or risk factors for CAD who are undergoing major noncardiac surgery, intraoperative ischemia is less severe than in our patients<sup>39</sup>; the greatest incidence of ST segment deviation is observed on awakening from general anesthesia, and there is a substantial incidence of ST segment deviation for at least 1 week after surgery.<sup>6,39,40,42</sup>

The incidence of MI in our patients is substantially greater than that in patients with CAD or risk factors for CAD who are having major noncardiac surgery.<sup>6,42</sup> Unlike our patients, patients undergoing noncardiac surgery usually do not have unstable angina. However, as can be deduced from tables 4 and 6, the incidence of MI in the 40% of our patients who had a history of unstable angina was not significantly greater than that in the remaining patients. After noncardiac surgery, most MIs occur 2 or more days after surgery.<sup>6,42</sup> The difference in the timing of MI after cardiac and noncardiac surgeries suggests that the primary mechanisms of MI for the two populations are different.



## ECG AND HEMODYNAMIC CHANGES AND MI DURING CABG

The association of ST segment deviation with MI in our population was comparable to that in ambulatory patients with suspected acute MI,<sup>33</sup> stronger than that reported for patients with CAD or risk factors for CAD undergoing major noncardiac surgery,<sup>6,42</sup> and for ambulatory patients with stable<sup>41</sup> or unstable<sup>35</sup> angina.

### Limitations of the Study

Combining patients who received acadesine or placebo may have influenced specific results but did not alter our primary conclusions. The predictors of MI and various other results are likely to be different at different clinical sites, although the results obtained from pooled data are presented. The lack of hemodynamic and EF data for a subset of patients was due to logistical concerns and is unlikely to have introduced a systematic bias in our results. Ejection fraction data are limited by the use of different methods of measurement for the preoperative and postoperative values and by lack of analysis at a core laboratory. Limitations of the Holter ECG and hemodynamic monitoring systems have been discussed previously. The serum CK-MB value as a measure of the extent of myocardial necrosis is limited by CK-MB release from incisions in the skeletal muscles and atria and by the variability of reperfusion of the necrotic myocardium. A lack of data for postoperative SBP, DBP, and HR and perioperative left ventricular filling pressure prevented evaluation of their potential predictive value for MI. The need to maintain SBP and HR within certain ranges was not established in this study. A lack of long-term follow-up limited our ability to determine the functional and prognostic significance of MI. This study did not evaluate the suitability of different criteria for MI.

### Conclusions

Detailed multicenter data collection and analysis at core laboratories detected substantial site-to-site variability in the incidence of MI and an overall incidence of up to 25%. Most MIs were triggered by events occurring minutes to hours after the release of aortic occlusion and were strongly associated with major ECG changes also occurring primarily during this period. During perioperative monitoring, 58% of the patients had major ECG changes.

### References

1. Jain U, Wallis DE, Moran JF: Significance of electrocardiographic ST elevation during coronary artery bypass surgery. *Anesth Analg* 1994; 78:638-43
2. Jain U: Myocardial infarction during coronary artery bypass surgery. *J Cardiothorac Vasc Anesth* 1992; 6:612-23
3. Leung JM, O'Kelly B, Browner WS, Tubau J, Hollenberg M, Mangano DT, SPI Research Group: Prognostic importance of postbypass regional wall-motion abnormalities in patients undergoing coronary artery bypass graft surgery. *ANESTHESIOLOGY* 1989; 71:16-25
4. Slogoff S, Keats AS: Does perioperative myocardial ischemia lead to postoperative myocardial infarction? *ANESTHESIOLOGY* 1985; 62:107-14
5. The Multicenter Study of Perioperative Ischemia (McSPI) Research Group: Effects of acadesine on morbidity and mortality following coronary artery bypass graft surgery. *ANESTHESIOLOGY* 1995; 83:658-73
6. Mangano DT: Perioperative cardiac morbidity. *ANESTHESIOLOGY* 1990; 72:153-84
7. Knight AA, Hollenberg M, London MJ, Tubau J, Verrier E, Browner W, Mangano DT, SPI Research Group: Perioperative myocardial ischemia: Importance of the preoperative ischemic pattern. *ANESTHESIOLOGY* 1988; 68:681-8
8. Tu JV, Jaglal SB, Naylor CD, Steering Committee of the Provincial Adult Cardiac Care Network of Ontario: Multicenter validation of a risk index for mortality, intensive care unit stay, and overall hospital length of stay after cardiac surgery. *Circulation* 1995; 91:677-84
9. Jain U, Body SC, Bellows W, Wolman R, Mora Mangano C, Mathew J, Youngs E, Wilson R, Zhang A, Mangano DT, for the Multicenter Study of Perioperative Ischemia (McSPI) Research Group: Multicenter study of target-controlled infusion of propofol-sufentanil or sufentanil-midazolam for coronary artery bypass graft surgery. *ANESTHESIOLOGY* 1996; 85:522-35
10. Prineas RJ, Crow RS, Blackburn H: The Minnesota Code Manual of Electrocardiographic Findings. Boston, J. Wright, 1982
11. Hanley JA, McNeil BJ: The meaning and use of the area under a receiver operating characteristic (ROC) curve. *Radiology* 1982; 143:29-36
12. L'Italien G, Paul S, Hendel R, Leppo J, Cohen M, Fleisher L, Brown K, Zarich S, Cambria R, Cutler B, Eagle K: Development and validation of a Bayesian model for perioperative cardiac risk assessment in a cohort of 1,081 vascular surgical candidates. *J Am Coll Cardiol* 1996; 27:779-86
13. Hosmer DW, Lemeshow S: Goodness-of-fit tests for the multiple logistic regression model. *Commun Statist P A Theor Methods* 1980; A9:1043-69
14. Wahr JA, Plunkett JJ, Ramsay JG, Reeves J, Jain U, Ley C, Wilson R, Mangano DT, the institutions of the McSPI Research Group: Cardiovascular responses during sedation after coronary revascularization: Incidence of myocardial ischemia and hemodynamic episodes with propofol versus midazolam. *ANESTHESIOLOGY* 1996; 84:1350-60
15. Jain U: Myocardial ischemia after cardiopulmonary bypass. *J Card Surg* 1995; 10:520-6
16. Jain U: An electrocardiographic lead system for coronary artery bypass surgery. *J Clin Anesth* 1996; 8:19-24
17. Banai S, Moriel M, Benhorin J, Gavish A, Stern S, Tzivoni D:



- Changes in myocardial ischemic threshold during daily activities. *Am J Cardiol* 1990; 66:1403-6
18. Burns RJ, Gladstone PJ, Tremblay PC, Feindel CM, Salter DR, Lipton IH, Ogilvie RR, David TE: Myocardial infarction determined by technetium-99m pyrophosphate single-photon tomography complicating elective coronary artery bypass grafting for angina pectoris. *Am J Cardiol* 1989; 63:1429-34
  19. van Vlies B, Royen EA, Visser CA, Meyne NG, van Buul MM, Peters RJ, Dunning AJ: Frequency of myocardial Indium-111 antimony uptake after uncomplicated coronary artery bypass grafting. *Am J Cardiol* 1990; 66:1191-5
  20. Schaff HV, Gersh BJ, Fisher LD, Frye RL, Mock MB, Ryan TJ, Ellis RB, Chaitman BR, Alderman EL, Kaiser GC, Faxon DP, Bourassa MG: Detrimental effect of perioperative myocardial infarction on late survival after coronary artery bypass. Report from the Coronary Artery Surgery Study—CASS. *J Thorac Cardiovasc Surg* 1984; 88:972-81
  21. Force T, Hibberd P, Weeks G, Kemper AJ, Bloomfield P, Tow D, Josa M, Khuri S, Parisi AF: Perioperative myocardial infarction after coronary artery bypass surgery. Clinical significance and approach to risk stratification. *Circulation* 1990; 82:903-12
  22. Chaitman BR, Alderman EL, Sheffield LT, Tong T, Fisher L, Mock MB, Weins RD, Kaiser GC, Roitman D, Berger R, Gersh B, Schaff H, Bourassa MG, Killip T, and Participating CASS Medical Centers: Use of survival analysis to determine the clinical significance of new Q waves after coronary bypass surgery. *Circulation* 1983; 67:302-9
  23. Uusitupa M, Pyörälä K, Raunio H, Rissanen V, Lampainen E: Sensitivity and specificity of Minnesota Code Q-QS abnormalities in the diagnosis of myocardial infarction verified at autopsy. *Am Heart J* 1983; 106:753-7
  24. Van Lente F, Martin A, Ratliff NB, Kazmierczak SC, Loop FD: The predictive value of serum enzymes for perioperative myocardial infarction after cardiac operations. An autopsy study. *J Thorac Cardiovasc Surg* 1989; 98:704-10
  25. Van Lente F, McHugh AM, Galen RS: Changes in serum CK-MB mass after coronary artery bypass surgery. *Clin Biochem* 1987; 20:333-7
  26. Abdelmeguid AE, Topol EJ, Whitlow PL, Sapp SK, Ellis SG: Significance of mild transient release of creatine kinase-MB fraction after percutaneous coronary interventions. *Circulation* 1996; 94:1528-36
  27. Kong TQ Jr, Davidson CJ, Meyers SN, Tauke JT, Parker MA, Bonow RO: Prognostic implication of creatine kinase elevation following elective coronary artery interventions. *JAMA* 1997; 277:461-6
  28. Pocock SJ, Henderson RA, Rickards AF, Hampton JR, King SB III, Hamm CW, Puel J, Hueb W, Goy JJ, Rodriguez A: Meta-analysis of randomized trials comparing coronary angioplasty with bypass surgery. *Lancet* 1995; 346:1184-9
  29. King III SB, Lembo NJ, Weintraub WS, Kosinski AS, Barnhart HX, Kutner MH, Alazraki NP, Guyton RA, Zhao XQ, The Emory Angioplasty vs. Surgery Trial (EAST): A randomized trial comparing coronary angioplasty with coronary bypass surgery. *N Engl J Med* 1994; 331:1044-50
  30. Mangano DT: for the Multicenter Study of Perioperative Ischemia (McSPI) Research Group: Effects of acadesine on myocardial infarction, stroke and death following surgery: A meta-analysis of the five international randomized trials. *JAMA* 1997; 277:325-32
  31. Yusuf S, Zucker D, Peduzzi P, Fisher LD, Takaro T, Kennedy JW, Davis K, Killip T, Passamani E, Norris R, Morris C, Mathur V, Varnauskas E, Chalmers TC: Effect of coronary artery bypass graft surgery on survival: Overview of 10-year results from randomized trials by the Coronary Artery Bypass Graft Surgery Trialists Collaboration. *Lancet* 1994; 344:563-70
  32. Bassan MM, Oatfield R, Hoffman I, Matloff J, Swan HJ: New Q waves after aortocoronary bypass surgery. Unmasking of an old infarction. *N Engl J Med* 1974; 290:349-53
  33. Fernandez AR, Sequeira RF, Chakko S, Correa LF, de Marchena EJ, Chahine RA, Franceour DA, Myerburg RJ: ST segment tracking for rapid determination of patency of the infarct-related artery in acute myocardial infarction. *J Am Coll Cardiol* 1995; 26:675-83
  34. Jain U: Myocardial injury during reoperation for coronary artery bypass surgery. *J Cardiothorac Vasc Anesth* 1995; 9:389-94
  35. Gottlieb SO, Weisfeldt ML, Ouyang P, Mellits ED, Gerstenblith G: Silent ischemia as a marker for early unfavorable outcomes in patients with unstable angina. *N Engl J Med* 1986; 314:1214-9
  36. Landesberg G, Luria MH, Cotev S, Eidelman LA, Anner H, Mosseri M, Schechter D, Assaf J, Erel J, Berlatzky Y: Importance of long-duration postoperative ST-segment depression in cardiac morbidity after vascular surgery. *Lancet* 1993; 341:715-9
  37. Gold J, Charlson M, Williams-Russo P, Szatrowski T, Peterson J, Pirraglia P, Hartman G, Yao F, Hollenberg J, Barbut D, Hayes J, Thomas S, Purcell M, Mattis S, Gorkin L, Post M, Krieger K, Isom O: Improvement of outcomes after coronary artery bypass. A randomized trial comparing intraoperative high versus low mean arterial pressure. *J Thorac Cardiovasc Surg* 1995; 110:1302-14
  38. Leung J, O'Kelly B, Mangano DT, SPI Research Group: Relationship of regional wall motion abnormalities to hemodynamic indices of myocardial oxygen supply and demand in patients undergoing CABG surgery. *ANESTHESIOLOGY* 1990; 73:802-14
  39. Mangano DT, Hollenberg M, Fegert G, Meyer M, London M, Tubau J, Krupski W, The Study of Perioperative Ischemia (SPI) Research Group: Perioperative myocardial ischemia in patients undergoing noncardiac surgery—I: Incidence and severity during the four-day perioperative period. *J Am Coll Cardiol* 1991; 17:843-50
  40. Mangano DT, Wong MG, London MJ, Tubau JF, Rapp JA, Study of Perioperative Ischemia (SPI) Research Group: Perioperative myocardial ischemia in patients undergoing noncardiac surgery—II: Incidence and severity during the 1st week after surgery. *J Am Coll Cardiol* 1991; 17:851-7
  41. Rogers WJ, Bourassa MG, Andrews TC, Bertolet BD, Blumenthal RS, Chaitman BR, Forman SA, Geller NL, Goldberg AD, Habib GB, Masters RG, Moisa RB, Mueller H, Pearce DJ, Pepine CJ, Sopko G, Steingart RM, Stone PH, Knatterud GL, Conti CR, for the ACIP Investigators: Asymptomatic Cardiac Ischemia Pilot (ACIP) Study: Outcome at 1 year for patients with asymptomatic cardiac ischemia randomized to medical therapy or revascularization. *J Am Coll Cardiol* 1995; 26:594-605
  42. Mangano DT, Browner WS, Hollenberg M, London MJ, Tubau JF, Tateo IM, SPI Research Group: Association of perioperative myocardial ischemia with cardiac morbidity and mortality in men undergoing noncardiac surgery. *N Engl J Med* 1990; 323:1781-8



## ECG AND HEMODYNAMIC CHANGES AND MI DURING CABG

**Appendix I. Clinical Sites and Principal Investigators**

| Clinical Site                                   | Principal Investigator                                         |
|-------------------------------------------------|----------------------------------------------------------------|
| University of Alabama                           | William Lell, M.D.                                             |
| Beth Israel Hospital (Harvard)                  | Mark Comunale, M.D.                                            |
| Brigham & Women's Hospital (Harvard)            | Rosemarie Maddi, M.D.                                          |
| University of California, San Francisco         | Jacqueline Leung, M.D.                                         |
| Cedars-Sinai Medical Center                     | Arnold Friedman, M.D.                                          |
| Cleveland Clinic                                | Norman Starr, M.D.                                             |
| Cornell University                              | Onofrio Patafio, M.D.                                          |
| Creighton University                            | Syed Mohiuddin, M.D.                                           |
| Deborah Heart Institute                         | Mark Adkins, M.D.                                              |
| Duke University                                 | Thomas Stanley, M.D.                                           |
| Kaiser Permanente Medical Center, San Francisco | Wayne Bellows, M.D.;<br>Gary Roach, M.D.;<br>John Reeves, M.D. |
| Massachusetts General Hospital (Harvard)        | Michael D'Ambra, M.D.                                          |
| University of Michigan                          | Joyce Wahr, M.D.                                               |
| New York University                             | Katherine Marschall, M.D.                                      |
| Stanford University                             | Lawrence Siegel, M.D.                                          |
| Medical College of Virginia                     | Judith Fabian, M.D.                                            |
| University of Washington                        | Bruce Spiess, M.D.                                             |
| Western Pennsylvania Hospital                   | Alan Gradman, M.D.                                             |
| Medical College of Wisconsin                    | Anil Aggarwal, M.D.                                            |
| Yale University                                 | Joseph Mathew, M.D.                                            |

**Appendix II. Core Laboratories**

|                                              |                                                                                                                                                                                    |
|----------------------------------------------|------------------------------------------------------------------------------------------------------------------------------------------------------------------------------------|
| Director                                     | Dennis T. Mangano, Ph.D., M.D.                                                                                                                                                     |
| Holter analysis                              | Uday Jain, Ph.D.; M.D.; Claude Laflamme, M.D.; Milton Hollenberg, M.D.; Krzysztof H. Ziola, M.D.; Dean Alokozai, M.D.; Nadir Alocozy, M.D.; Malgorzata Ziola, M.D.; Kate Haratonik |
| 12-lead ECG analysis                         | Milton Hollenberg, M.D.; Krzysztof H. Ziola, M.D.; Mervin Goldman, M.D.; Adriana Radulescu, M.D.                                                                                   |
| Database management/<br>statistical analysis | Sudhanshu Ghoshal, Ph.D., D.Sc.; Long Ngo, M.S.                                                                                                                                    |
| Transcription and editing                    | Barabara O'Donnell, Diane Beatty, Corbin Krug, Winnifred von Ehrenberg                                                                                                             |
| Graphics                                     | Mark Riddle                                                                                                                                                                        |

CK-MB analysis was performed by SmithKlineBeecham, Inc., Van Nuys, CA. Many persons at the clinical sites, core laboratories, and Gensia, Inc. contributed to collection of the data.
